# Supplementary material
Source: ML conference proceedings conference paper supplement (https://proceedings.neurips.cc/paper_files/paper/2024/hash/9c8df8de46c1a1b39b30b9f74be69c02-Abstract.html)
Supplement: Supplementary file 1 [file 9c8df8de46c1a1b39b30b9f74be69c02-Supplemental-Conference.zip]

# CONFORMALIZED SURVIVAL DISTRIBUTIONS

## A GENERIC POST-PROCESS TO INCREASE CALIBRATION

Shi-ang Qi<sup>1</sup>, Yakun Yu<sup>1</sup>, Russell Greiner<sup>1,2</sup>

<sup>1</sup>University of Alberta, <sup>2</sup>Alberta Machine Intelligence Institute

{shiang, yakun2, rgreiner}@ualberta.ca

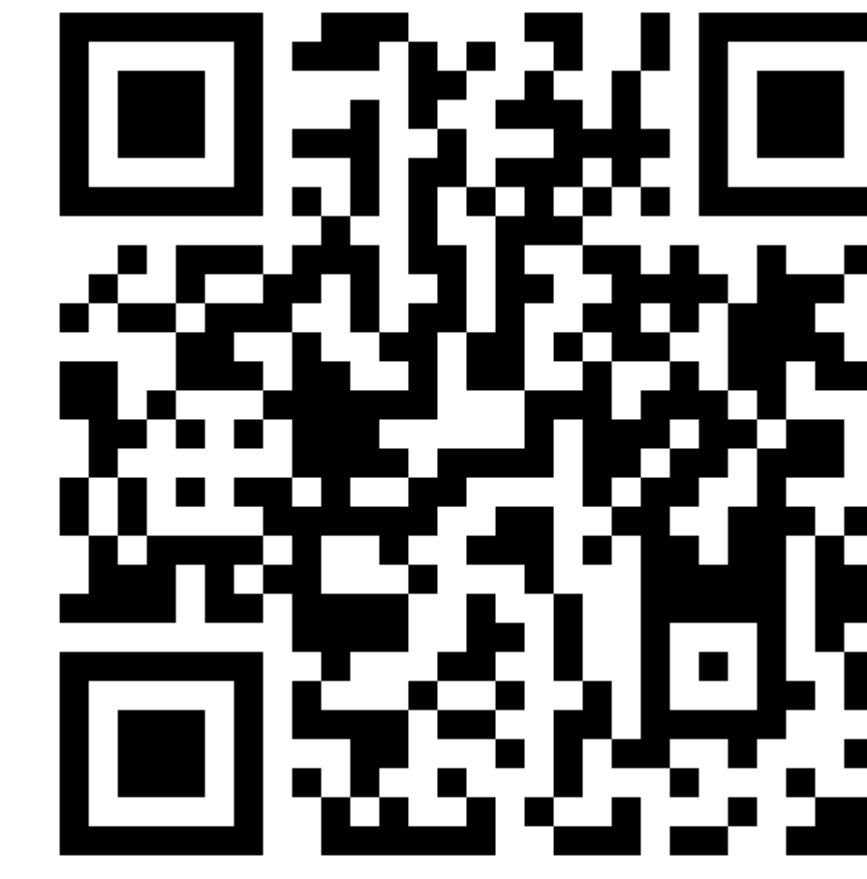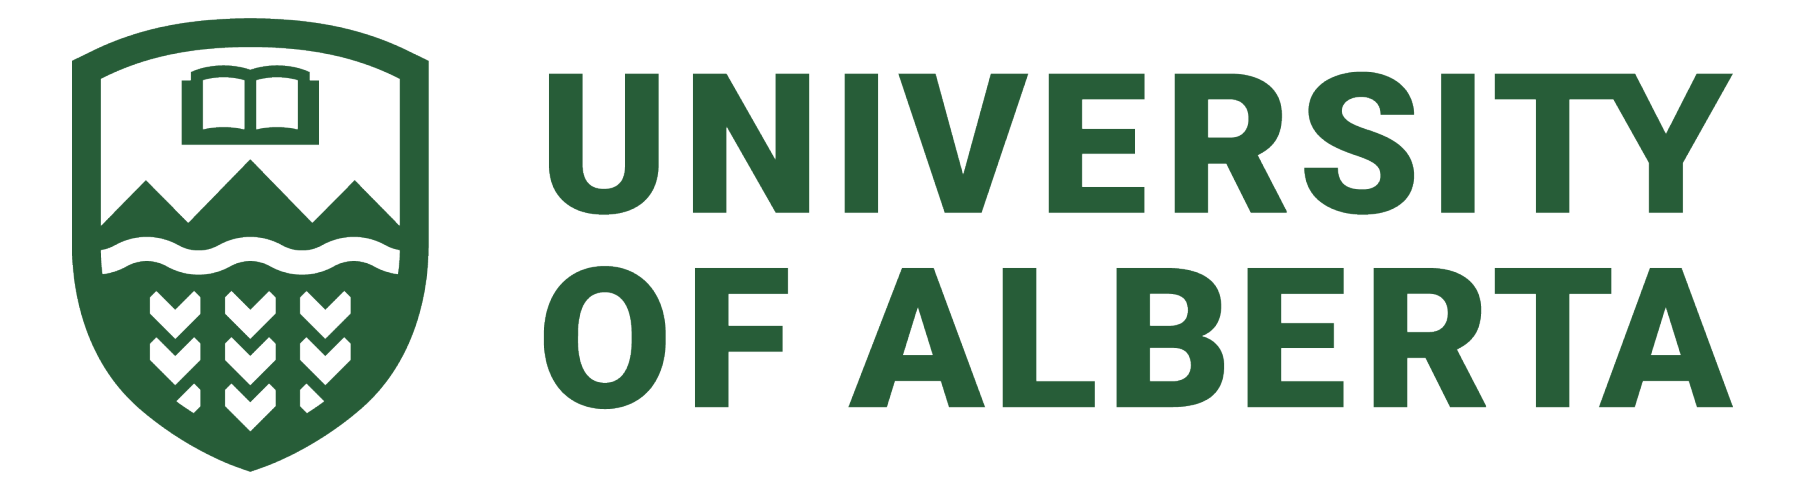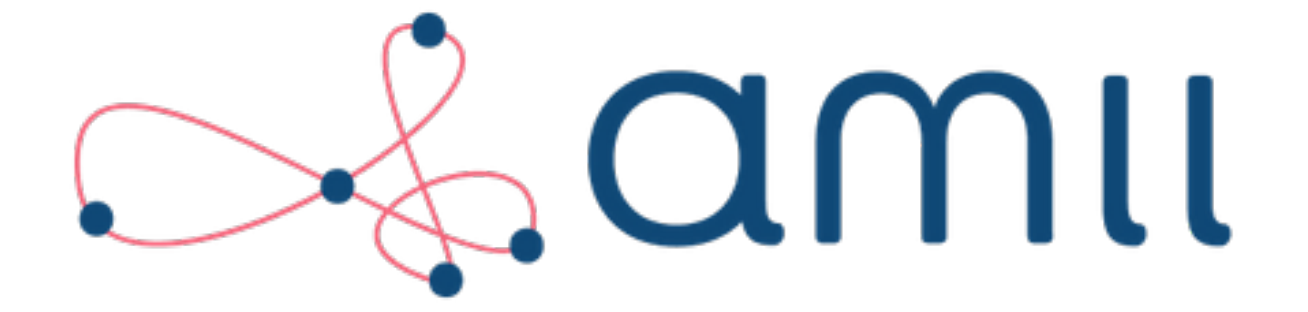

### OBJECTIVES

Boost a survival model's calibration ability while maintaining the same discrimination ability.

### SURVIVAL ANALYSIS

A subject (described  $\mathbf{x}_i$ ) is **right-censored** iff it has not experienced an event at the observed time. Each subject is:  $[\mathbf{x}_i, \text{observed time } t_i, \text{indicator } \delta_i]$ , which is based on event time  $e_i$  and censor time  $c_i$ .

$$t_i \triangleq \min\{e_i, c_i\} \quad \text{and} \quad \delta_i \triangleq \mathbf{1}[e_i \leq c_i]$$

Assumptions: (i) **exchangeable** and (ii) **conditional independent censoring**,  $e_i \perp c_i \mid \mathbf{x}_i$

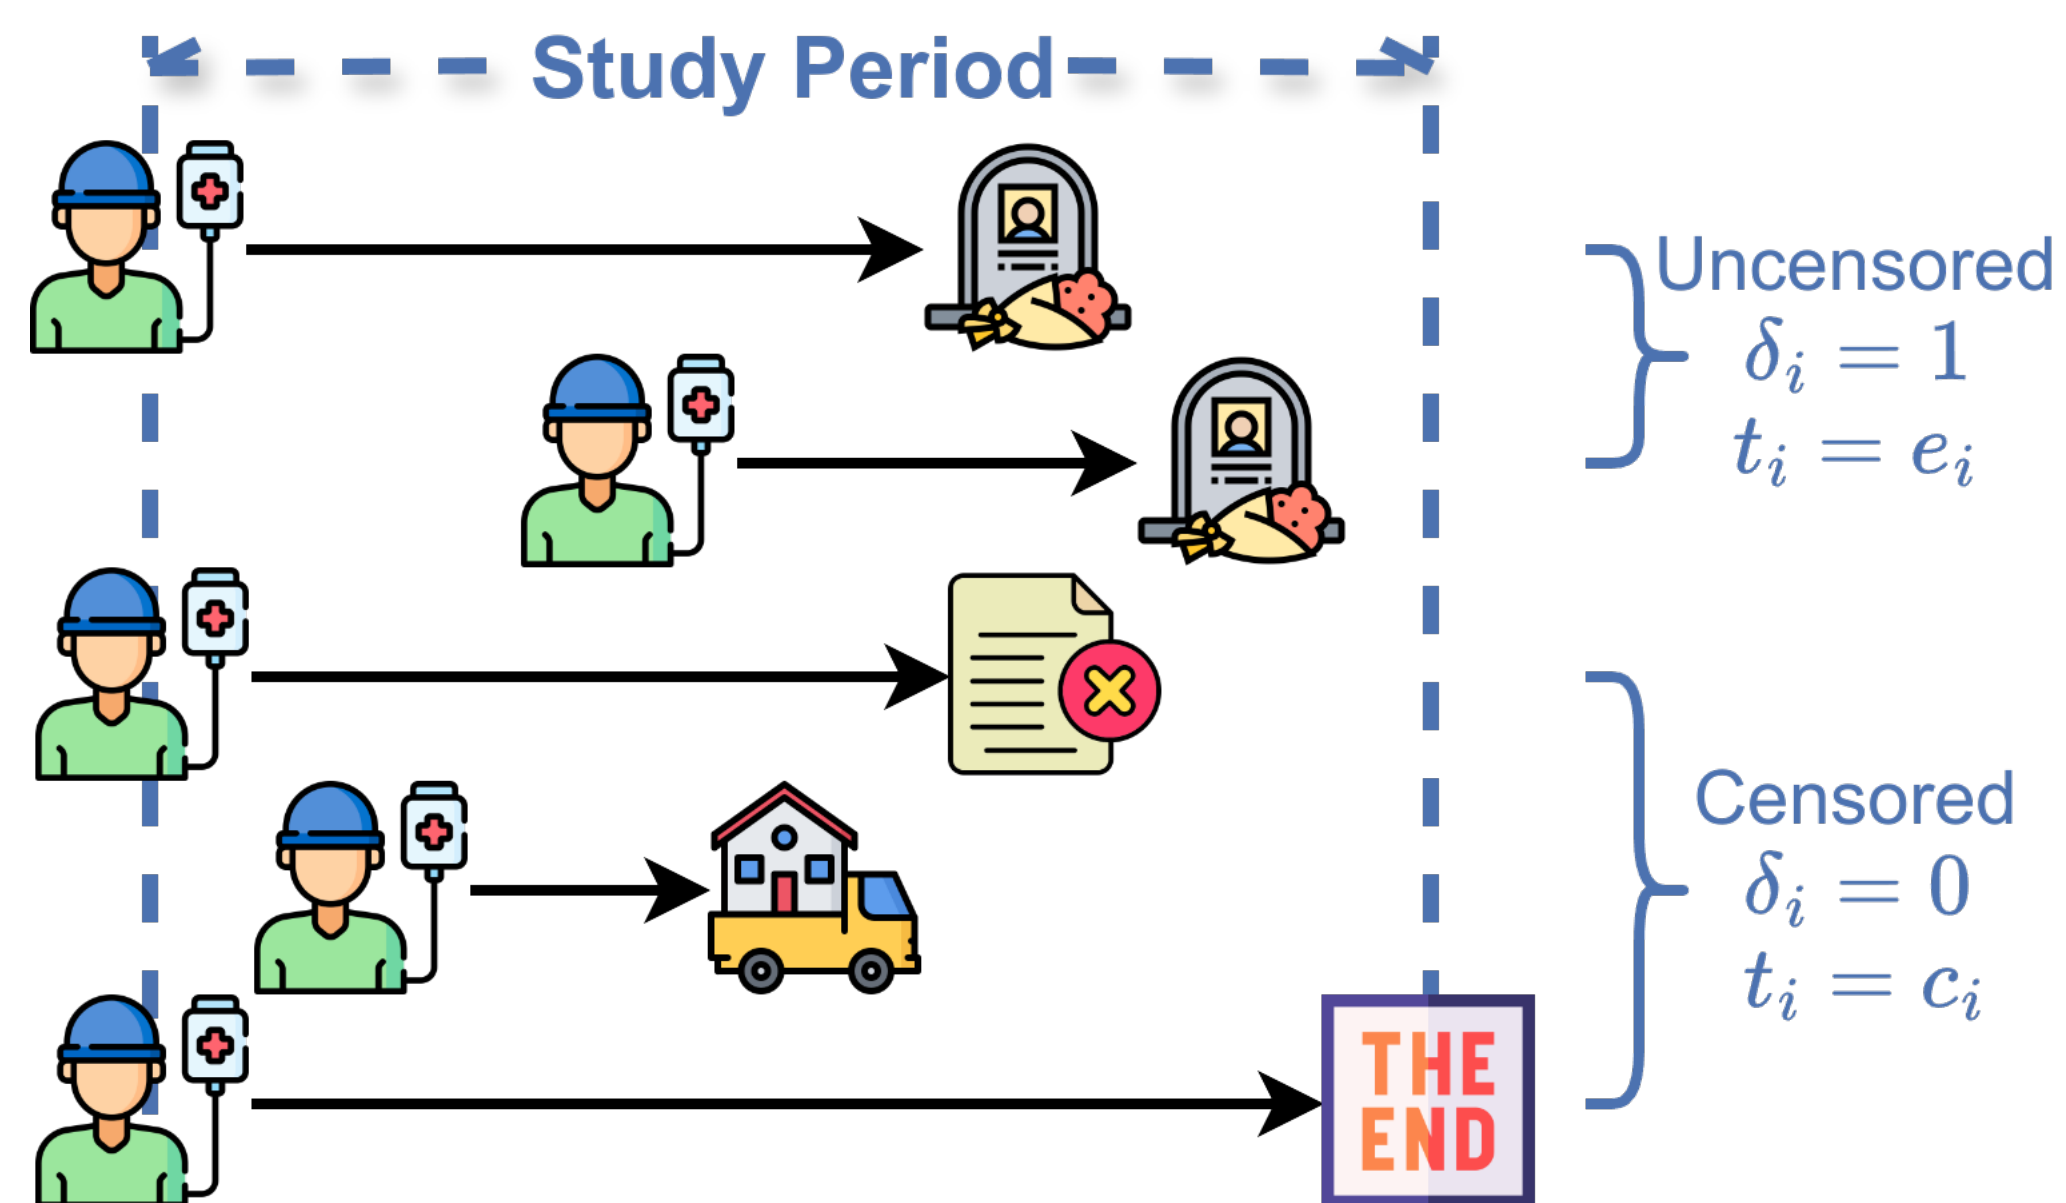

**Individual Survival Distribution (ISD)** is a probability curve for all future times for a patient:

$$S(t \mid \mathbf{x}_i) = \Pr(e_i > t \mid \mathbf{x}_i).$$

### DISCRIMINATION<sub>vs</sub> CALIBRATION

**Discrimination**: ability to accurately rank subjects.

**Calibration**: predicted probs. match the obs.

Objective-based methods:  $\mathcal{L} = \mathcal{L}_{\text{likelihood}} + \lambda \mathcal{L}_{\text{cal}}$

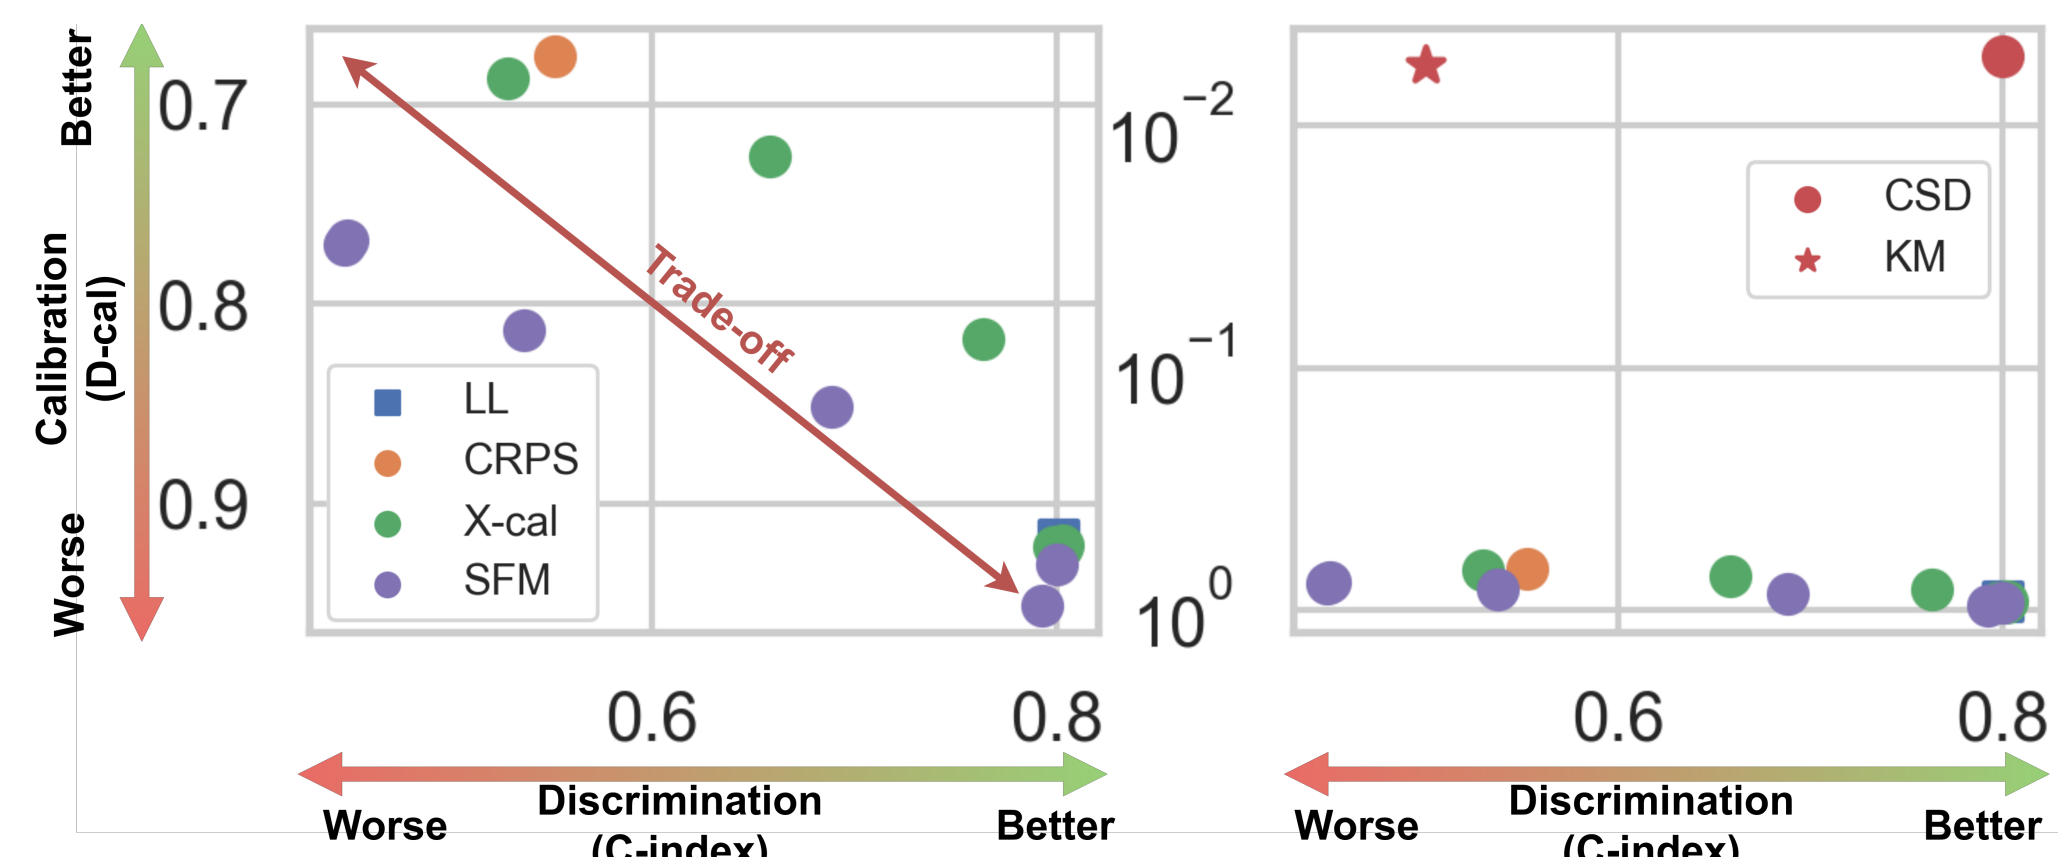

### CALIBRATION IN SURVIVAL ANALYSIS

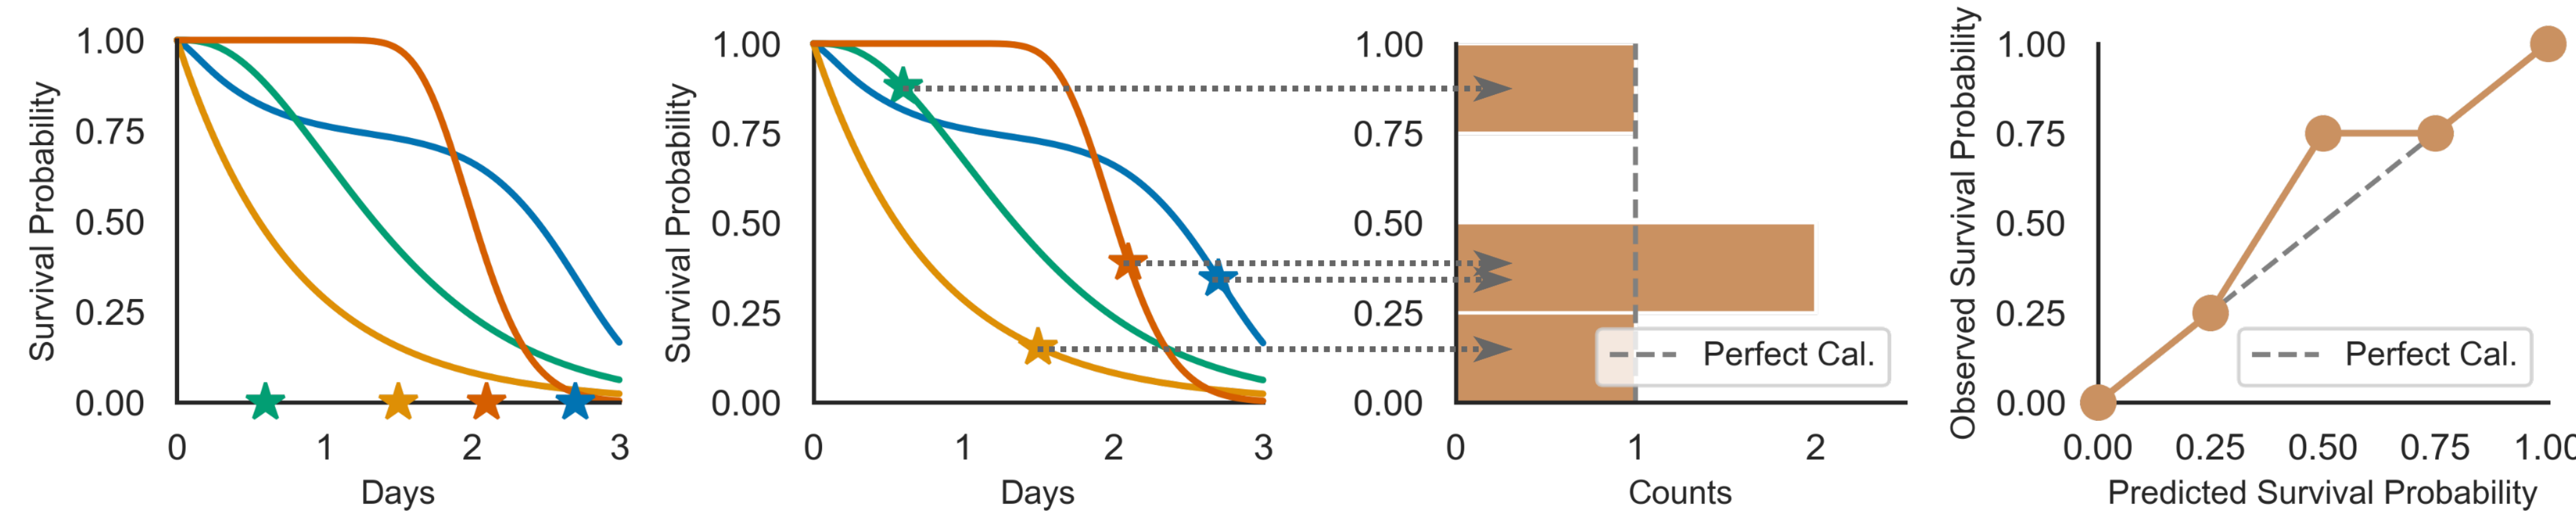

⇒ **Distribution calibration (D-cal)**[1]: the predicted survival probability at true event time,  $\{\hat{S}(e_i \mid \mathbf{x}_i)\}_i$ , should follow  $\mathcal{U}[0, 1]$  (*inverse transform theorem*). For a censored subject, it follows  $\mathcal{U}[0, \hat{S}(c_i \mid \mathbf{x}_i)]$ .  
⇒ **KM calibration (KM-cal)**: the average predicted ISD should align with the empirical survival distribution for the dataset (Kaplan-Meier curve). See the paper for a visual example.

### CONFORMALIZED SURVIVAL DISTRIBUTION

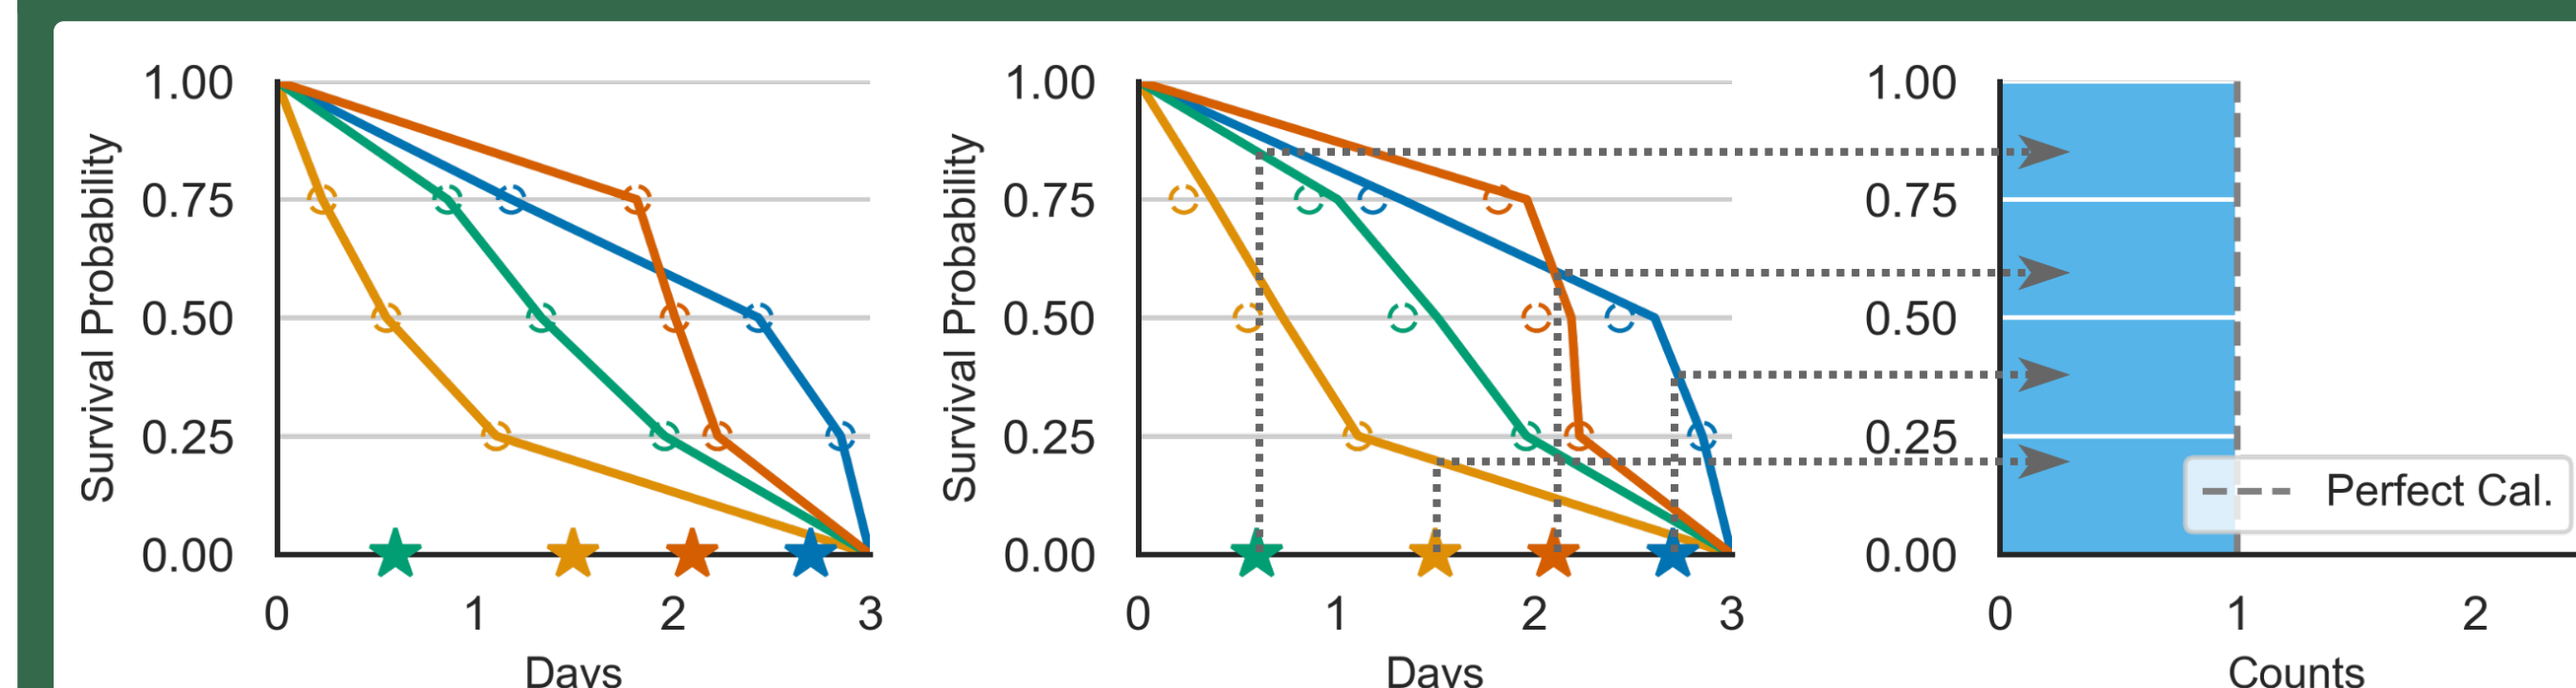

Main steps of CSD (for uncensored subjects):

- Split data to a training set  $\mathcal{D}_{\text{train}}$  and a conformal set  $\mathcal{D}_{\text{con}}$ .
- Learn a model  $\mathcal{M}$  from  $\mathcal{D}_{\text{train}}$  and predict ISDs for  $\mathcal{D}_{\text{con}}$ .
- Discretize the ISD predictions at predefined percentile levels  $\rho$ .  

$$\hat{q}_{\mathcal{M}}(\rho \mid \mathbf{x}_i) = \inf\{t : \hat{S}_{\mathcal{M}}(t \mid \mathbf{x}_i) \leq \rho\} = \hat{S}_{\mathcal{M}}^{-1}(\rho \mid \mathbf{x}_i),$$
- Apply conformal quantile regression [2] at each percentile level.
  - $s_{i,\mathcal{M}}(\rho) = \hat{q}_{\mathcal{M}}(\rho \mid \mathbf{x}_i) - t_i, \quad \mathcal{S}_{\mathcal{M}}(\rho) = \{s_{j,\mathcal{M}}(\rho)\}_{j=1}^{|\mathcal{D}_{\text{con}}|},$
  - $\hat{q}'_{\mathcal{M}}(\rho \mid \mathbf{x}_i) = \hat{q}_{\mathcal{M}}(\rho \mid \mathbf{x}_i) - \text{Quantile}[\rho; \mathcal{S}_{\mathcal{M}}(\rho)],$
- Apply rearranging methods to  $\hat{q}'_{\mathcal{M}}(\rho \mid \mathbf{x}_i)$  and transform to ISDs.

### THEORETICAL GUARANTEES

**Discrimination** Applying the CSD adjustment does not affect the Harrell's C-index of the model.

**D-cal** Under the assumptions (i) & (ii), CSD exhibits exact D-cal.

$$\forall \rho, \quad \rho \leq \Pr(t_i \in [\hat{q}'_{\mathcal{M}}(\rho \mid \mathbf{x}_i), \infty] \mid \mathbf{x}_i) \leq \rho + 1/(|\mathcal{D}_{\text{con}}| + 1).$$

**KM-cal** Under the assumptions (i) & (ii), CSD asymptotically exhibits exact integrated calibration at all time points.

### KM-SAMPLING

**Problem**: We do not know  $t_i$  for censored subjects (step 4).

**Solution**: Approximate the uncertainty of  $t_i$  using a “best-guess distribution”, and sampling surrogate times from it:

$$S_{\text{KM}}(t \mid t > c_i) = \min\left\{\frac{S_{\text{KM}}(t)}{S_{\text{KM}}(c_i)}, 1\right\}.$$

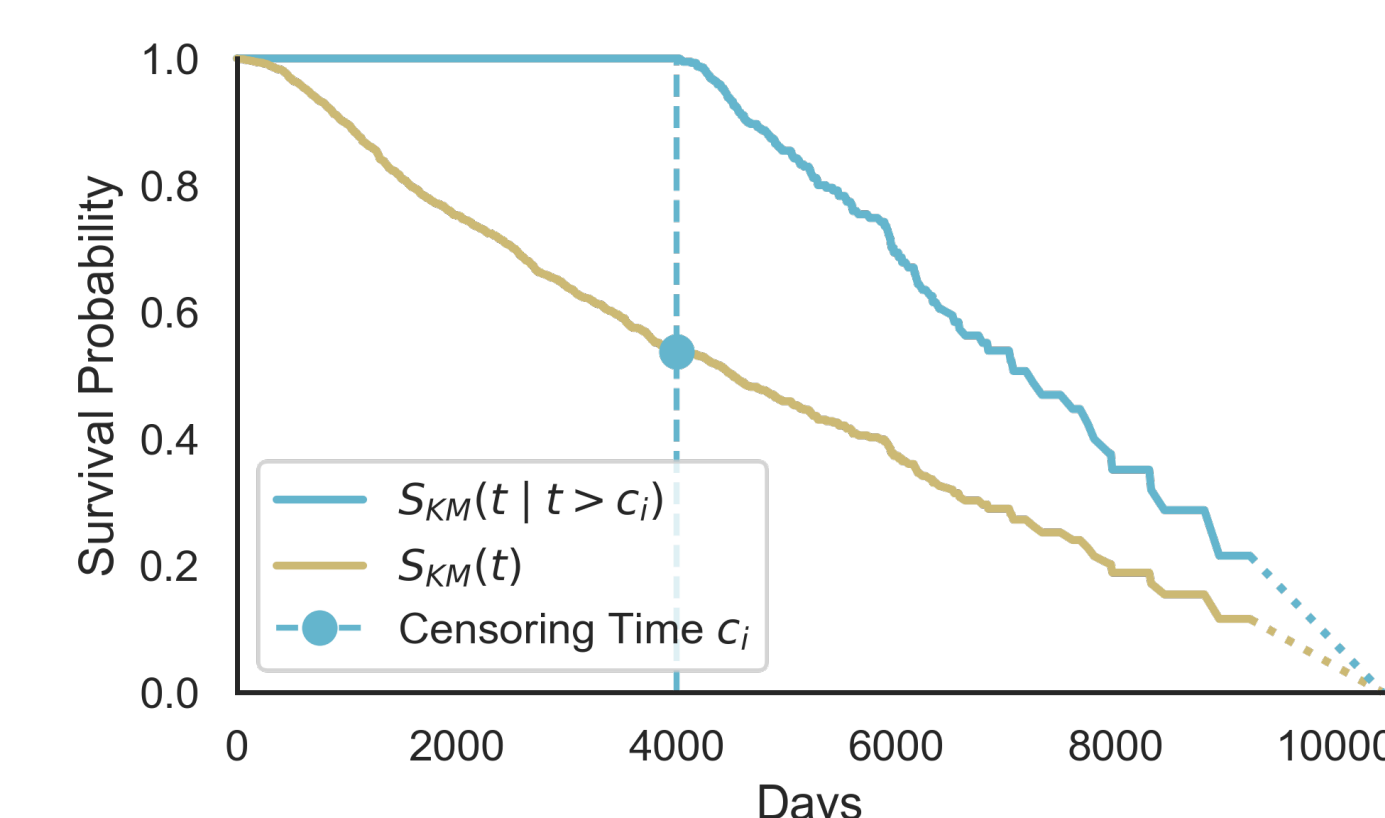

Repeat every subject  $R$  times:

$$s_{i,\mathcal{M}}^r(\rho) = \hat{q}_{\mathcal{M}}(\rho \mid \mathbf{x}_i) - t_i^r,$$

For a censored subject:

$$t_i^r \sim S_{\text{KM}}(t \mid t > c_i).$$

For an uncensored subject:

$$t_i^r \leftarrow e_i$$

**Why choose KM?** It is guaranteed to be asymptotically calibrated (both D-cal and KM-cal).

### EMPIRICAL RESULTS

**Blue**: baseline, **Orange**: baseline + CSD  
**Red dash line**: empirical lower bound for calib.

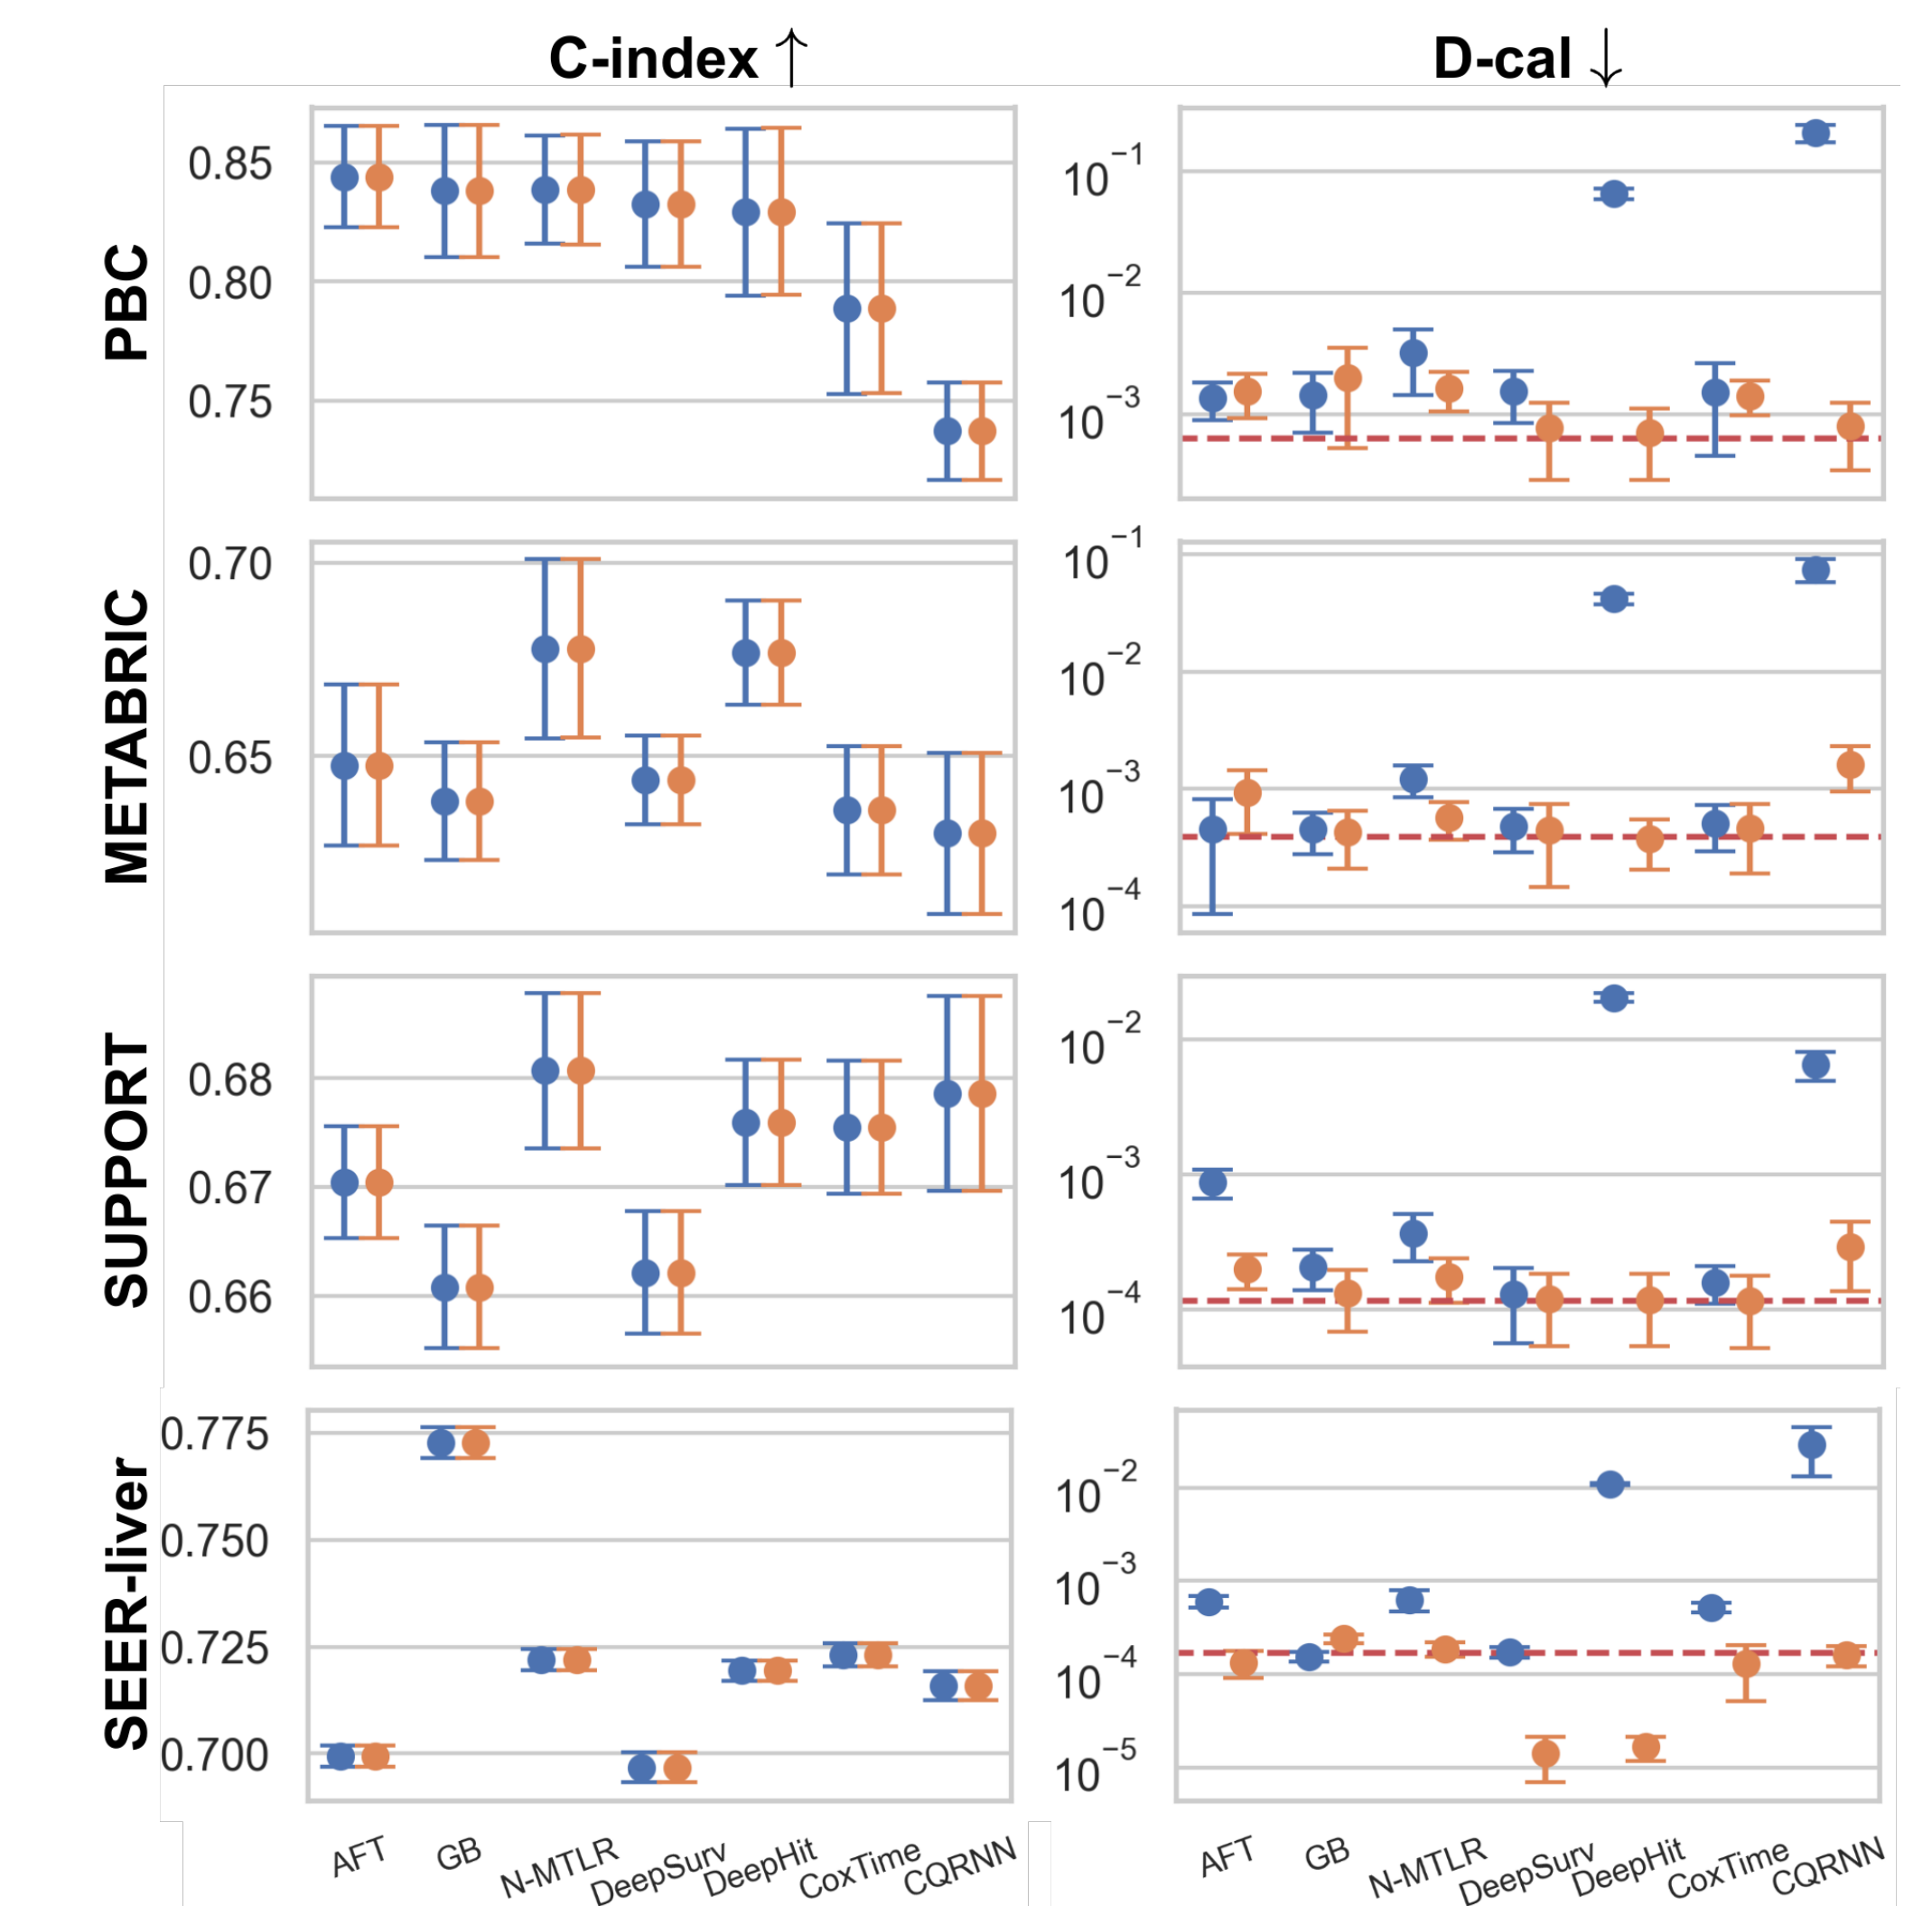

Using 11 real datasets and 7 baselines, we have 76 comparisons (AFT does not converge for 1 case).

|         | C-index   | D-cal         | KM-cal        | IBS           | MAE-PO       |
|---------|-----------|---------------|---------------|---------------|--------------|
| Non-CSD | 3(0)      | 8(1)          | 20(7)         | 12(0)         | 30(0)        |
| CSD     | 13(0)     | <b>68(35)</b> | <b>56(30)</b> | <b>61(14)</b> | <b>45(4)</b> |
| ties    | <b>60</b> | 0             | 0             | 3             | 1            |

† Number of wins (Number of significant wins with  $p < 0.05$ ).

*Findings from ablation studies:*

- KM sampling outperforms other naive methods.
- For small size data, we should reuse  $\mathcal{D}_{\text{train}}$  in the conformal step to maintain discriminative power.
- Different values of  $\rho$  have minimal impacts.

### REFERENCES

- [1] Humza Haider et al. Effective ways to build and evaluate individual survival distributions. JMLR 2020
- [2] Yaniv Romano et al. Conformalized Quantile Regression. NeurIPS 2019
