# Supplementary material
Source: ML conference proceedings conference paper supplement (https://proceedings.neurips.cc/paper_files/paper/2024/hash/9c8df8de46c1a1b39b30b9f74be69c02-Abstract.html)
Supplement: Supplementary file 2 [file 9c8df8de46c1a1b39b30b9f74be69c02-Supplemental-Conference.zip]

# TOWARD CONDITIONAL DISTRIBUTION CALIBRATION IN SURVIVAL PREDICTION

Shi-ang Qi<sup>1</sup>, Yakun Yu<sup>1</sup>, Russell Greiner<sup>1,2</sup>

<sup>1</sup>University of Alberta, <sup>2</sup>Alberta Machine Intelligence Institute {shiang, yakun2, rgreiner}@ualberta.ca

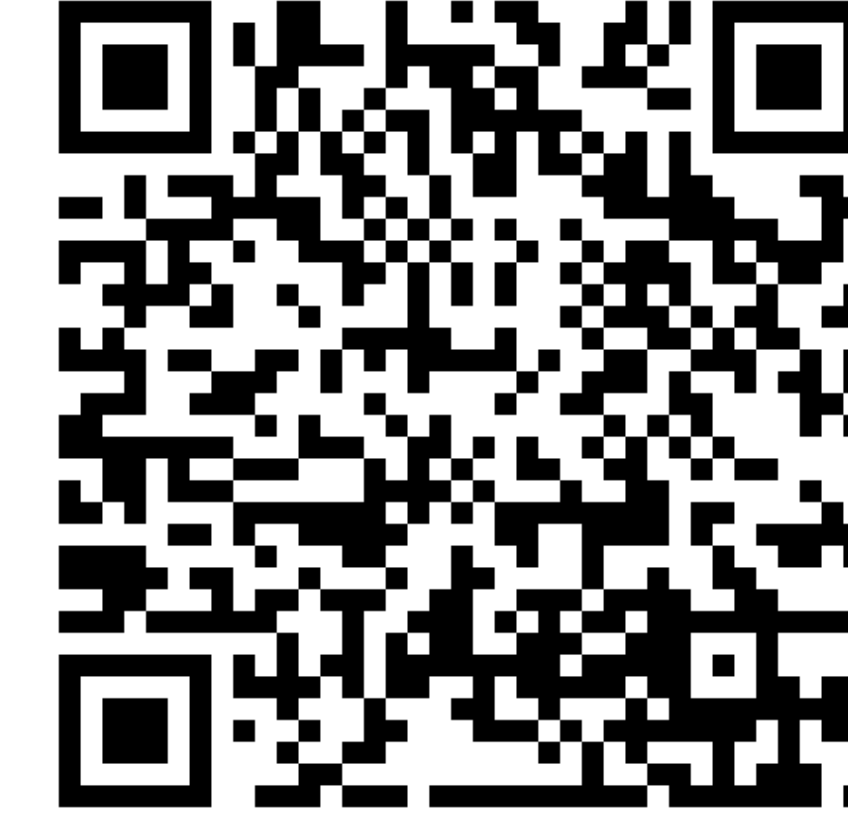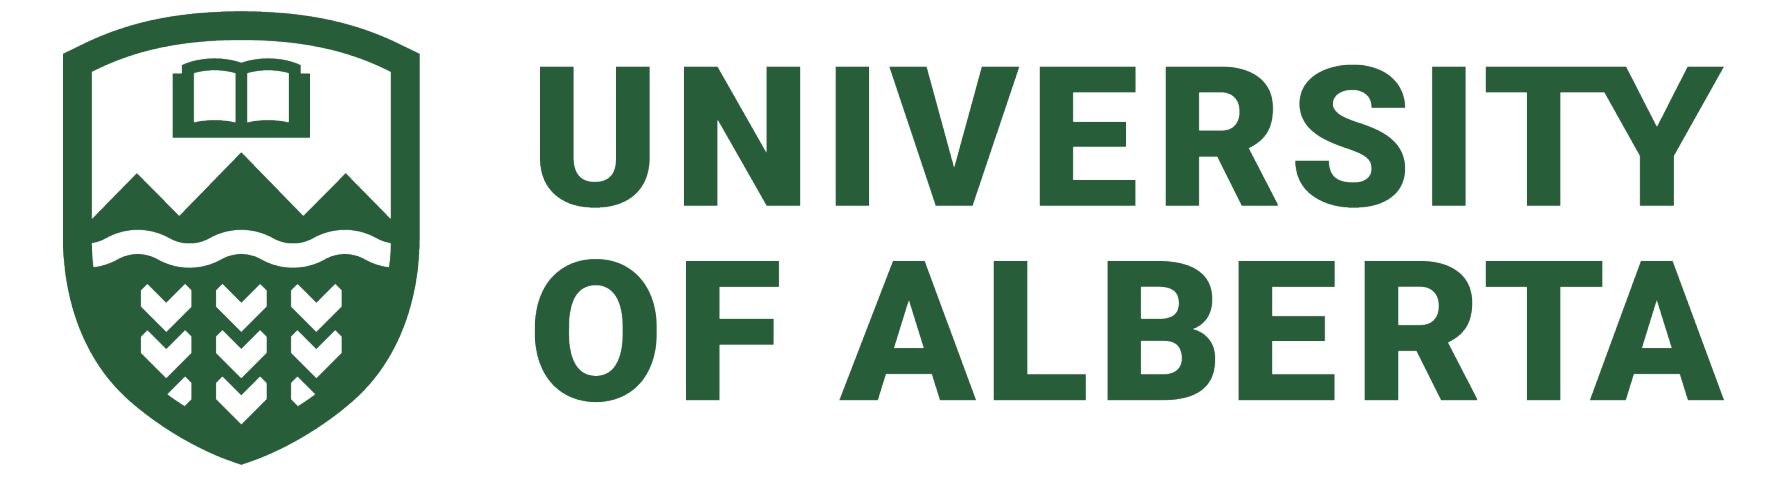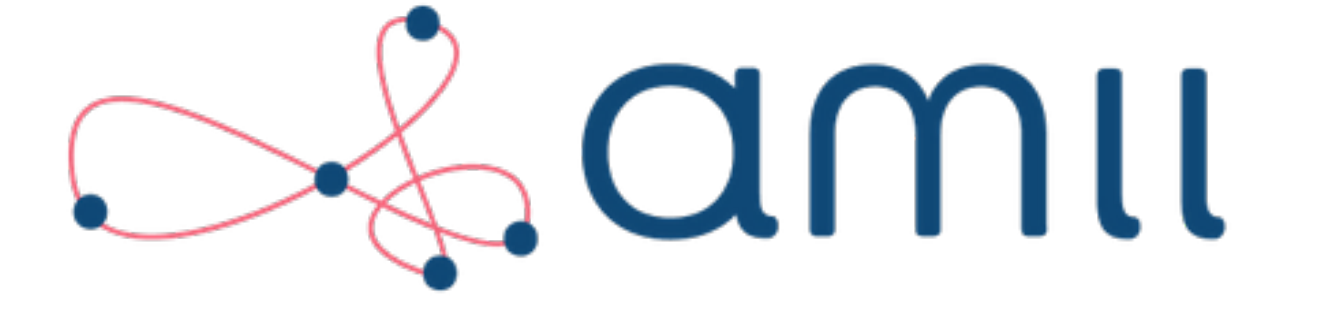

## OBJECTIVES

Boost a survival model's marginal and conditional calibration performance while maintaining the same discrimination ability.

## SURVIVAL ANALYSIS

A subject (described  $\mathbf{x}_i$ ) is **right-censored** iff it has not experienced an event at the observed time. Each subject is:  $[\mathbf{x}_i, \text{observed time } t_i, \text{indicator } \delta_i]$ , which is based on event time  $e_i$  and censor time  $c_i$ .

$$t_i \triangleq \min\{e_i, c_i\} \quad \text{and} \quad \delta_i \triangleq \mathbf{1}[e_i \leq c_i]$$

Assumptions: (i) **exchangeable** and (ii) **conditional independent censoring**,  $e_i \perp c_i \mid \mathbf{x}_i$

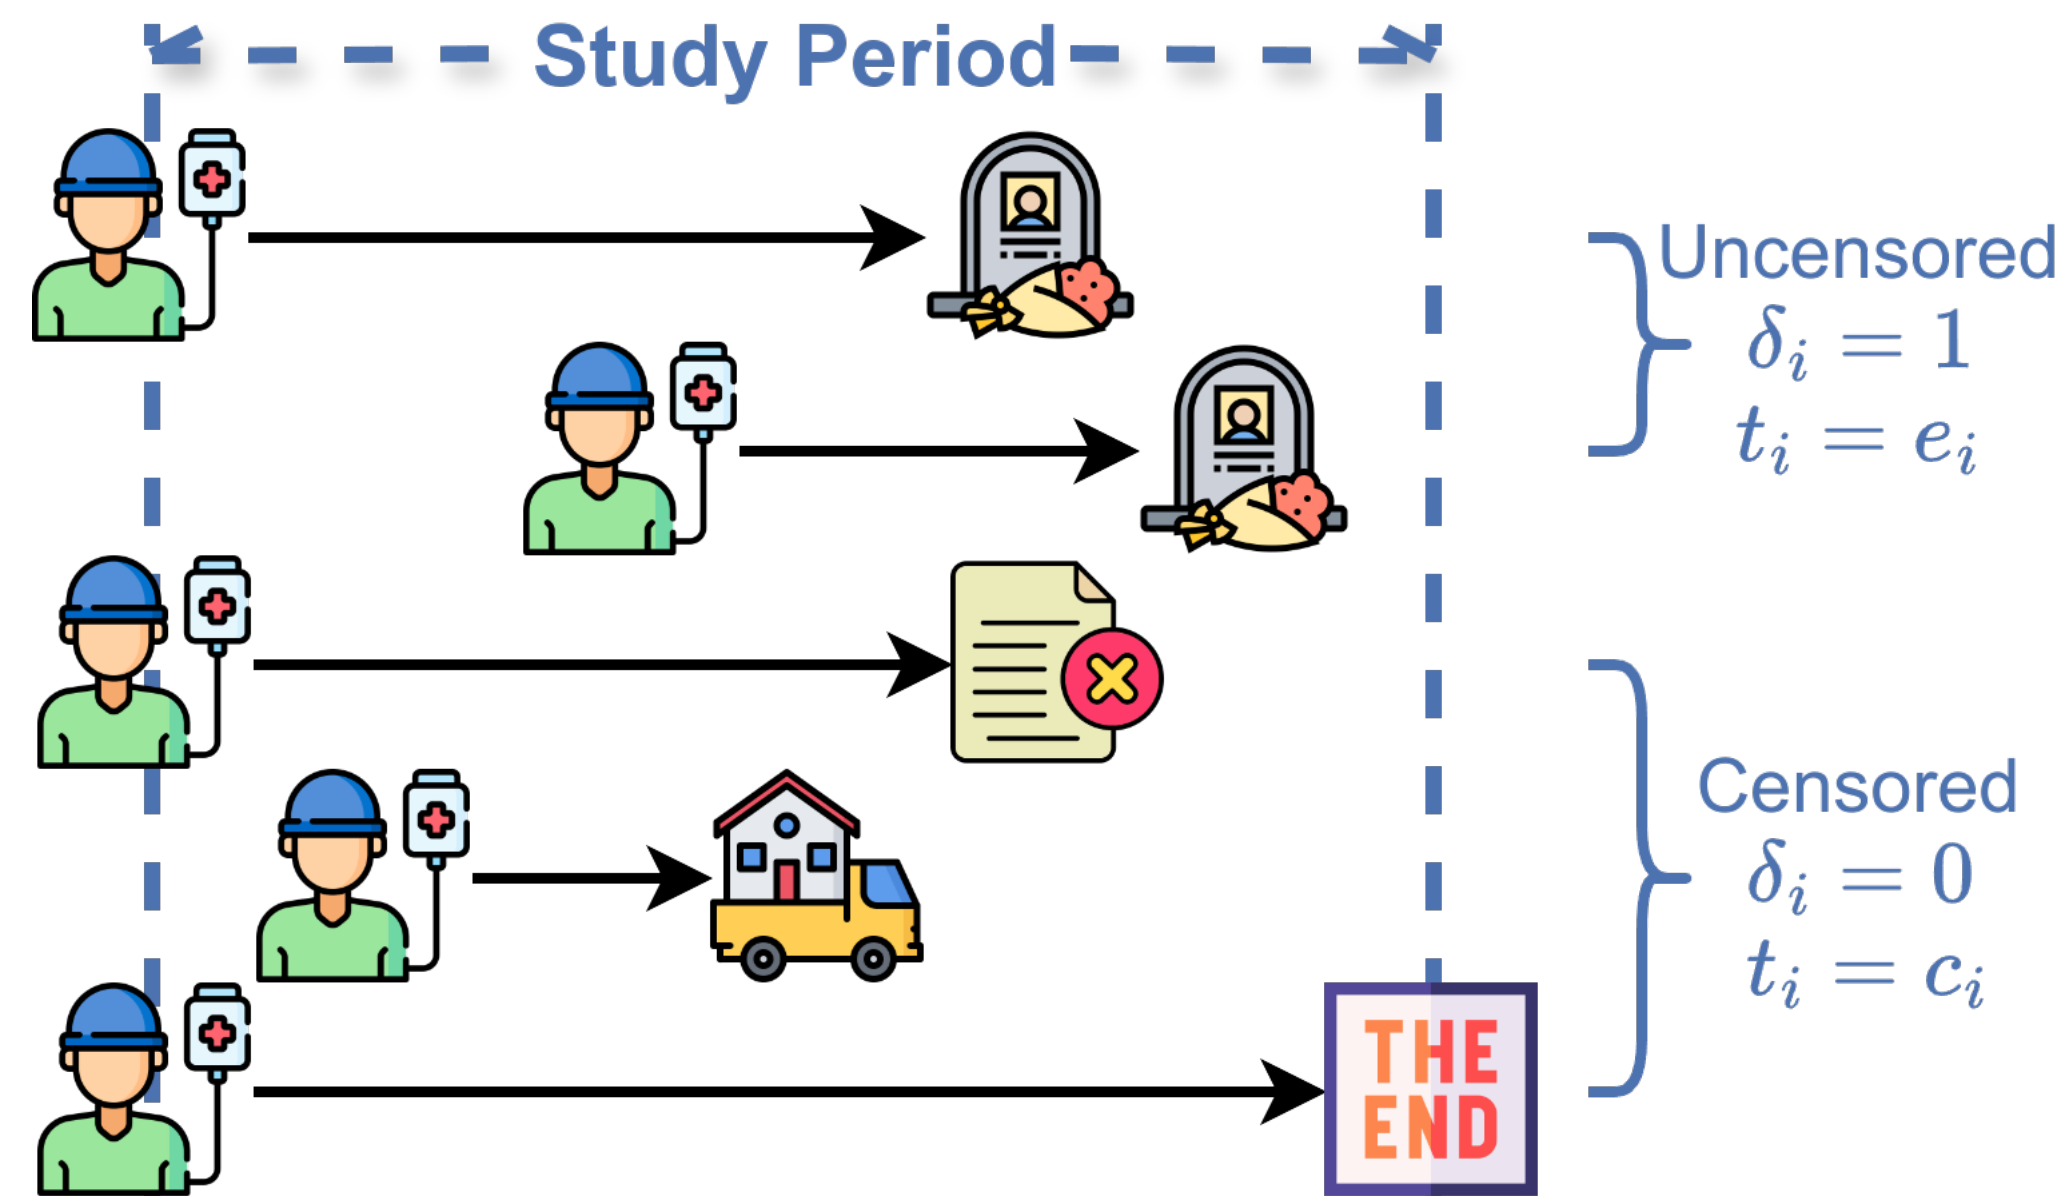

**Individual Survival Distribution (ISD)** is a probability curve for all future times for a patient:

$$S(t \mid \mathbf{x}_i) = \Pr(e_i > t \mid \mathbf{x}_i).$$

## THEORETICAL RESULTS

| Methods                                 | CSD [2]              | CSD-iPOT |
|-----------------------------------------|----------------------|----------|
| Marginal calibration guar. <sup>†</sup> | ✗                    | ✓        |
| Conditional calibration guar.           | ✗                    | ✓        |
| Monotonic                               | ✗                    | ✓        |
| Harrell discrimination guar.            | ✓                    | ✗        |
| Antolini discrimination guar.           | ✗                    | ✓        |
| Space complexity <sup>‡</sup>           | $O(NR \mathcal{P} )$ | $O(NR)$  |

<sup>†</sup> All the calibration guarantees are asymptotic guarantees.

<sup>‡</sup>  $N$ : #instances in the conformal set;  $R$ : sampling parameter;  $|\mathcal{P}|$ : #predefined percentile.

## CALIBRATION IN SURVIVAL ANALYSIS

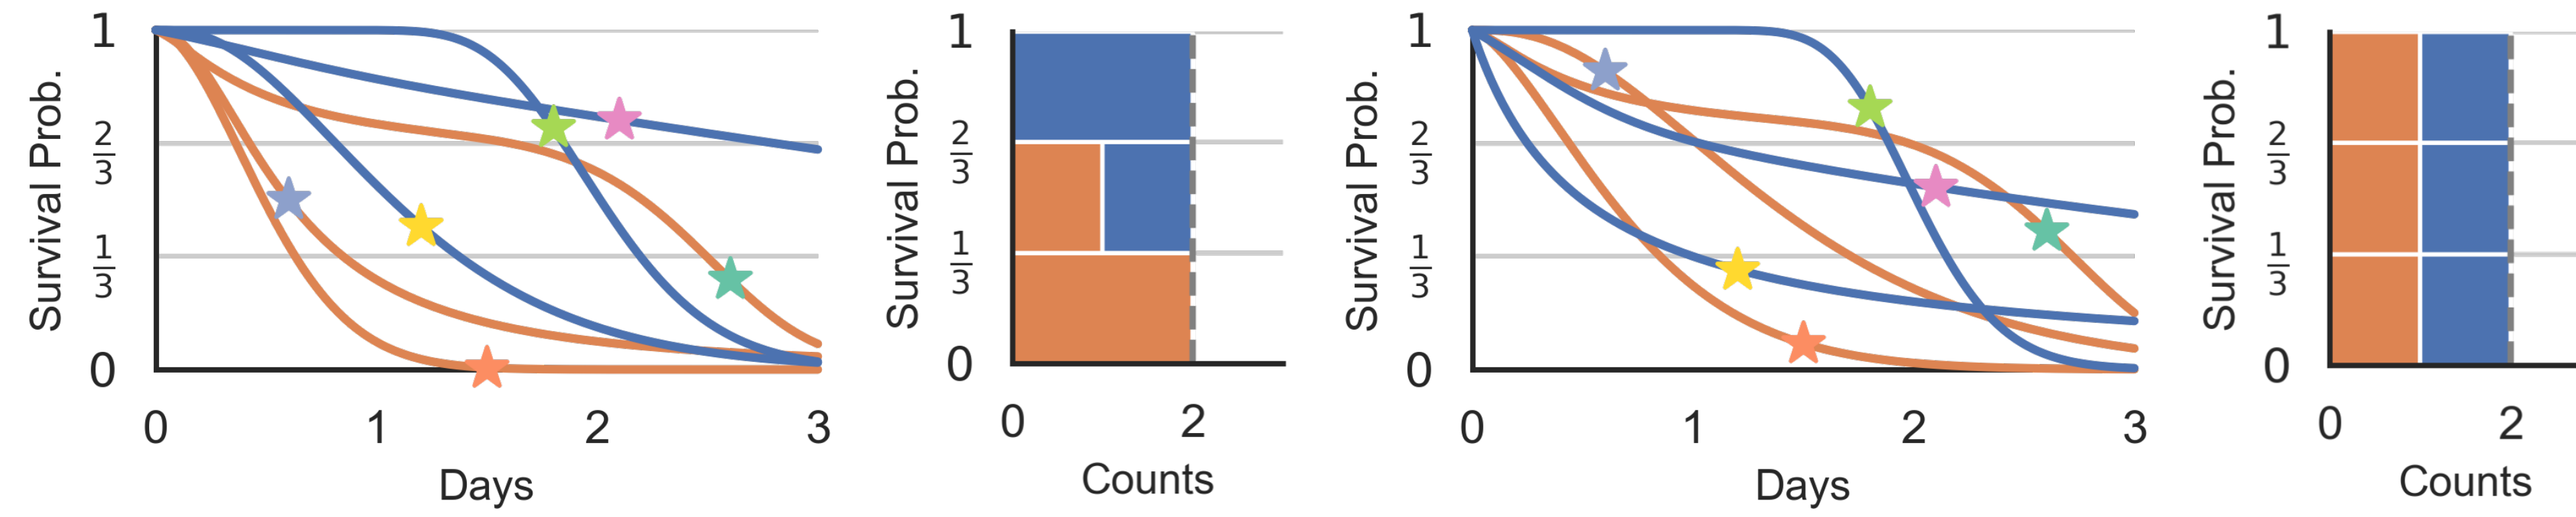

**Marginal calibration**[1]: the predicted survival probability at true event time,  $\{\hat{S}(e_i \mid \mathbf{x}_i)\}_i$ , should follow  $\mathcal{U}[0, 1]$  (*inverse transform theorem*). For a censored subject, it follows  $\mathcal{U}[0, \hat{S}(c_i \mid \mathbf{x}_i)]$ .

**Conditional calibration**:  $\{\hat{S}(e_i \mid \mathbf{x}_i)\}_i$ , should follow  $\mathcal{U}[0, 1]$ , for arbitrary group based on  $\mathbf{x}_i$ , e.g., age / sex / race. We propose  $\text{Cal}_{ws}$  – evaluate cal. on the worst calibrated sub-region in the feature space.

## METHOD

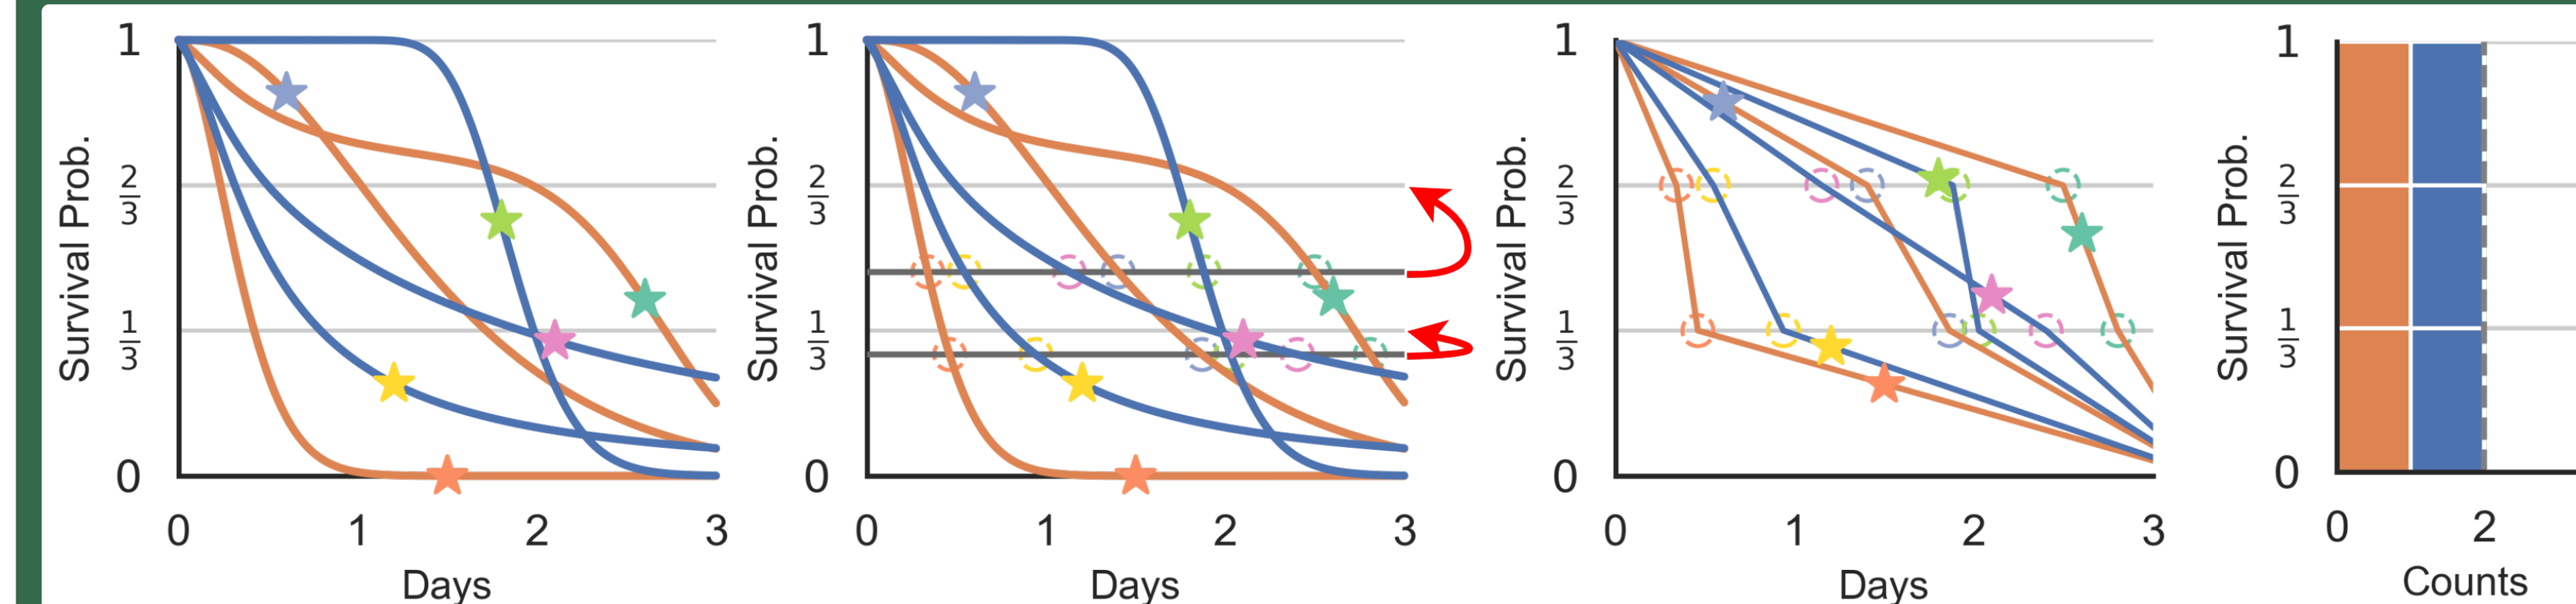

CSD-iPOT (conformalized survival distribution using individual probability at observed time):

- Split data, learn  $\mathcal{M}$  from  $\mathcal{D}_{\text{train}}$  and predict ISDs for  $\mathcal{D}_{\text{con}}$ :  $\{\hat{S}_{\mathcal{M}}(t \mid \mathbf{x}_i)\}_{i \in \mathcal{I}^{\text{con}}}$  (**curves**)
- Calculate individual probability at observed time (iPOT) as the conformity score (**stars**)

$$\gamma_{i,\mathcal{M}} := \hat{S}_{\mathcal{M}}(e_i \mid \mathbf{x}_i), \quad \Gamma_{\mathcal{M}} = \{\gamma_{i,\mathcal{M}}\}_{i \in \mathcal{I}^{\text{con}}}$$

- Apply the following adjustment for a testing subject with index  $n+1$ ,

$$\forall \rho \in \mathcal{P}, \quad \tilde{S}_{\mathcal{M}}^{-1}(\rho \mid \mathbf{x}_{n+1}) = \hat{S}_{\mathcal{M}}^{-1}(\text{Percentile}(\rho; \Gamma_{\mathcal{M}}) \mid \mathbf{x}_{n+1})$$

- Identify the empirical percentiles of the conformity score (**lines**)
- Determines the corresponding times on the predicted ISDs that match these empirical percentiles (**circles**)
- Vertically shift the empirical percentiles to the appropriate height (**arrows**)
- Transform the inverse ISD into an ISD:  $\tilde{S}_{\mathcal{M}}(t \mid \mathbf{x}_{n+1}) = \inf\{\rho : \tilde{S}_{\mathcal{M}}^{-1}(\rho \mid \mathbf{x}_{n+1}) \leq t\}$

For a *censored* subject, we **cannot** directly calculate conformity score  $\gamma_{i,\mathcal{M}} = \hat{S}_{\mathcal{M}}(e_i \mid \mathbf{x}_i)$ .

**Intuition**: given the prior knowledge  $\hat{S}_{\mathcal{M}}(e_i \mid \mathbf{x}_i) \sim \mathcal{U}_{[0,1]}$ , we update the knowledge by  $\hat{S}_{\mathcal{M}}(c_i \mid \mathbf{x}_i) > \hat{S}_{\mathcal{M}}(e_i \mid \mathbf{x}_i)$  and assumption (ii).

**Solution**: draw  $R$  potential conformity scores  $\sim \mathcal{U}_{[0, \hat{S}_{\mathcal{M}}(c_i \mid \mathbf{x}_i)]}$

$$\gamma_{i,\mathcal{M}} = \hat{S}_{\mathcal{M}}(c_i \mid \mathbf{x}_i) \cdot \mathbf{u}_R, \quad \text{where} \quad \mathbf{u}_R = [0/R, 1/R, \dots, R/R]$$

To maintain a balanced censoring rate, we repeat the iPOT value,  $R$  times, for each uncensored subject.

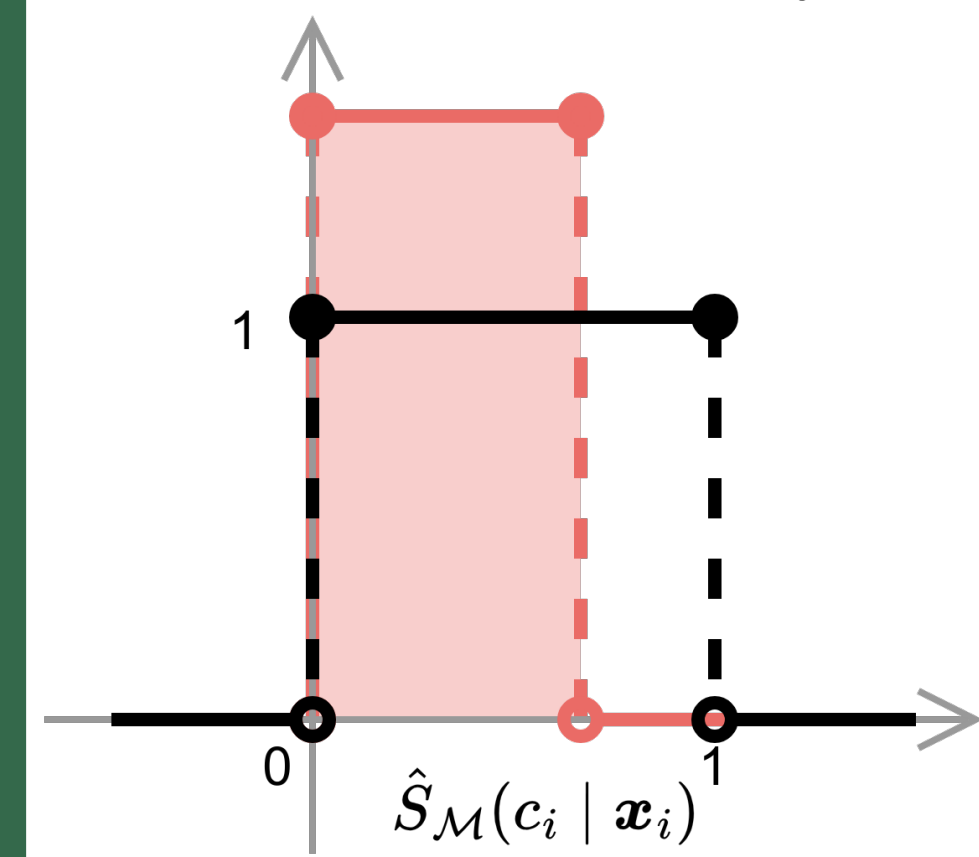

## EMPIRICAL RESULTS

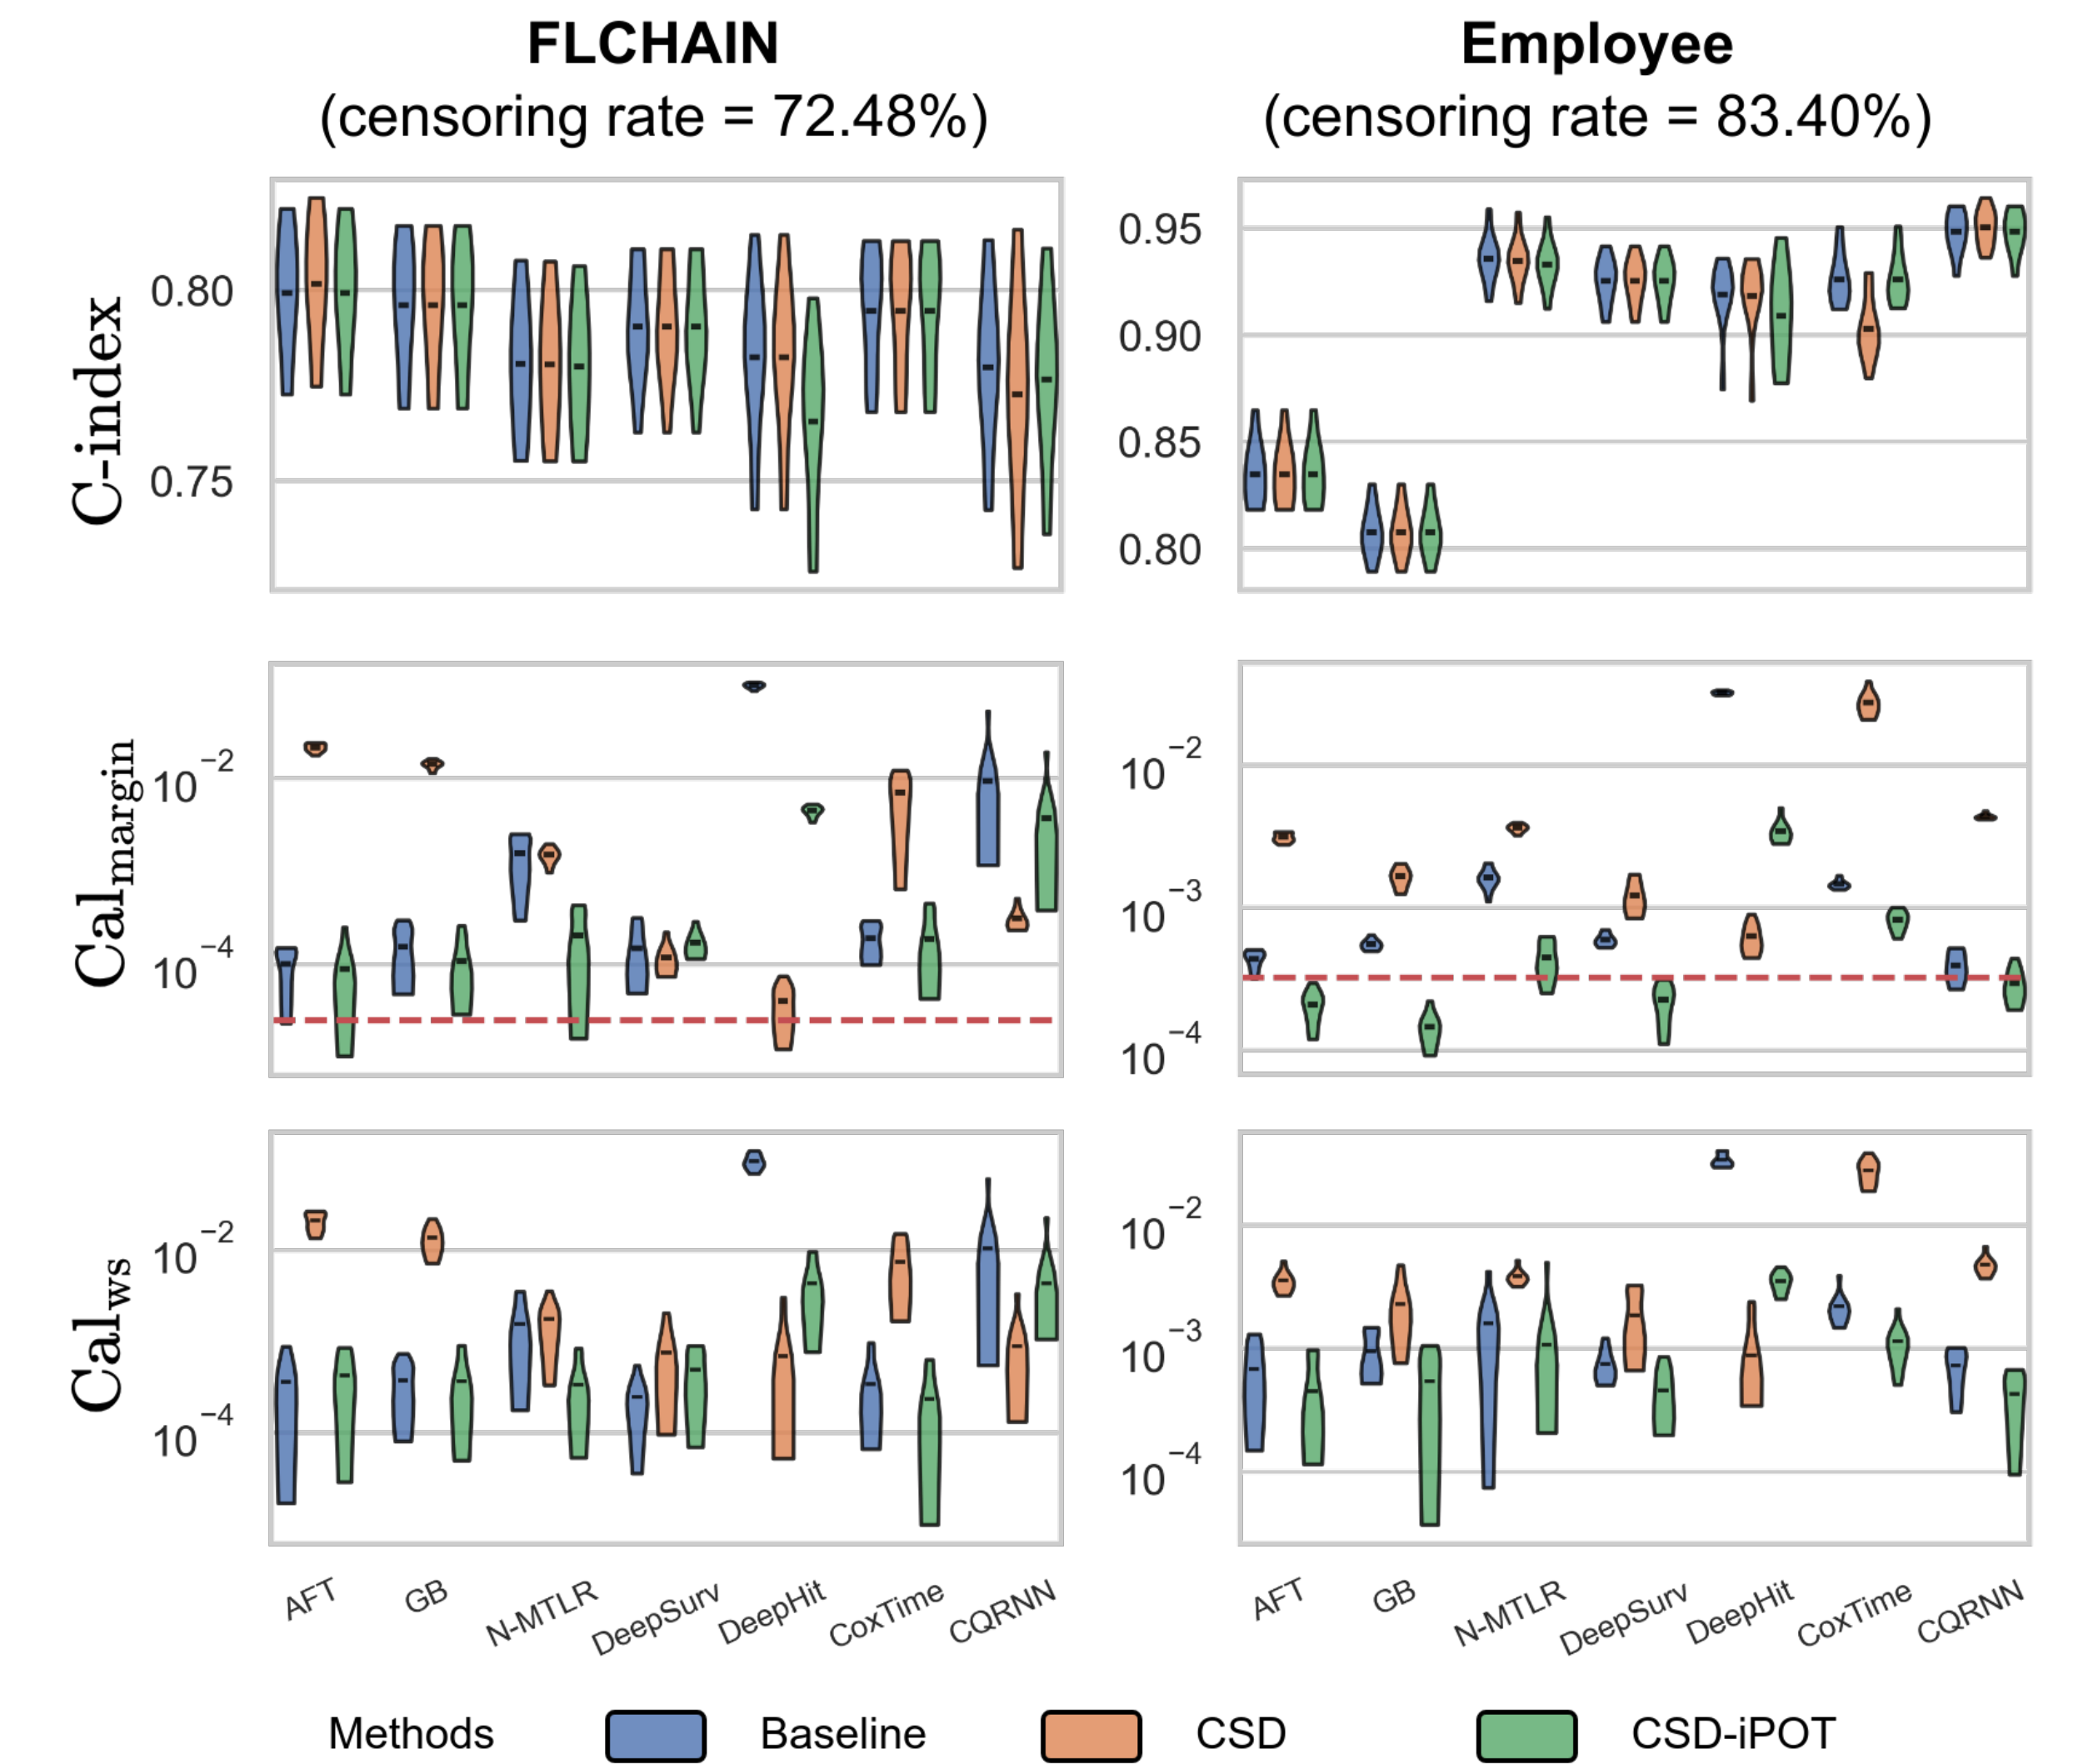

Comparisons using 15 real datasets and 7 baselines.

|              |      | C-index           | Cal <sub>margin</sub> | Cal <sub>ws</sub> <sup>‡</sup> | IBS           | MAE-PO       |
|--------------|------|-------------------|-----------------------|--------------------------------|---------------|--------------|
| cf. Baseline | Win  | 7(0) <sup>†</sup> | <b>95(50)</b>         | <b>64(29)</b>                  | <b>63(14)</b> | <b>54(8)</b> |
|              | Lose | 22(0)             | 9(1)                  | 5(1)                           | 23(0)         | 17(0)        |
|              | Tie  | <b>75</b>         | 0                     | 0                              | 18            | 33           |
| cf. CSD [2]  | Win  | 11(1)             | <b>68(37)</b>         | <b>51(26)</b>                  | <b>53(15)</b> | <b>39(8)</b> |
|              | Lose | 26(0)             | 36(20)                | 18(7)                          | 35(11)        | 39(4)        |
|              | Tie  | <b>67</b>         | 0                     | 0                              | 16            | 26           |

<sup>†</sup> Number of wins (Number of significant wins with  $p < 0.05$ ).

<sup>‡</sup> We only evaluate  $\text{Cal}_{ws}$  on datasets with  $n \geq 1000$ .

*Other findings from ablation studies:*

- CSD-iPOT requires less space and running time.
- A larger sampling parameter  $R$  can lead to better marginal and conditional calibration.
- Different values of  $\rho$  have minimal impacts.

## REFERENCES

- Haider et al. Effective ways to build and evaluate individual survival distributions. JMLR 2020
- Qi et al. Conformalized Survival Distributions: A Generic Post-Process to Increase Calibration. ICML 2024
